# Supplementary material for: Toxicogenomic Effects of Dissolved Saxitoxin on the Early Life Stages of the Longfin Yellowtail (Seriola rivoliana)
Source: Mar Drugs. 2023 Nov 18;21(11):597. doi: 10.3390/md21110597 (PMC10671919; doi:10.3390/md21110597)
Supplement: Supplementary file 1 [file marinedrugs-21-00597-s001.zip › marinedrugs-2610856-supplementary.pdf]

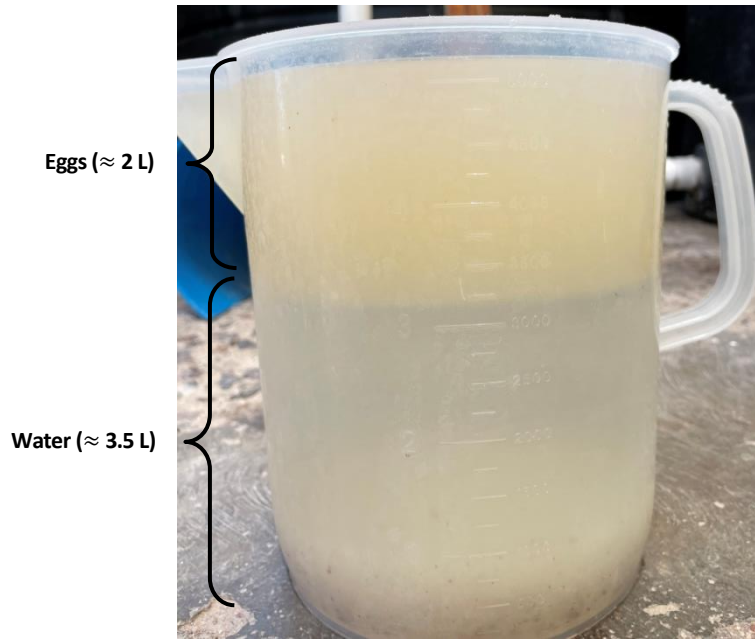

**Figure S1.** Spawning volume obtained from *S. rivoliana* broodstock reared by Kampachi Farms.

**Table S1.** Summary of the research on the effects of exposure to various concentrations of paralytic shellfish toxins (PSTs), including saxitoxin (STX) and gonyautoxin (GTX), in different fish species.

| Fish species                                                                               | Life stage; Tissue                                                                                                            | Toxin              | Concentration                                                                                                                                                                       | Exposure route and period                                         | Effects                                                                                                                                                                                | Reference |
|--------------------------------------------------------------------------------------------|-------------------------------------------------------------------------------------------------------------------------------|--------------------|-------------------------------------------------------------------------------------------------------------------------------------------------------------------------------------|-------------------------------------------------------------------|----------------------------------------------------------------------------------------------------------------------------------------------------------------------------------------|-----------|
| Capelin ( <i>Mallotus villosus</i> ); Atlantic herring ( <i>Clupea harengus harengus</i> ) | Capelin larvae aged 1, 2, 3, 5, 8, and 11 days; Herring larvae aged 1, 3, and 6 days; Herring post-larvae aged 10 and 15 days | PSTs (unspecified) | <i>A. tamarense</i> (2.5, 5, 10, and $15 \times 10^5$ cells L <sup>-1</sup> ); zooplankton that had eaten <i>A. tamarense</i> and extracted cellular content of <i>A. tamarense</i> | Oral ingestion and waterborne subacute exposure to dissolved PSTs | High mortality in fish larvae and early post-larvae either by direct or vectorial intoxication; Symptoms of paralysis; Insensitivity to dissolved toxin                                | [43]      |
| Zebrafish ( <i>Danio rerio</i> )                                                           | Embryos from 8 hpf to hatching; Larvae at 2, 4, and 6 dph                                                                     | STX                | 229 and 481 µg STX eq L <sup>-1</sup>                                                                                                                                               | Dissolved STX subacute exposure (7 days)                          | Mortality; Growth retardation; Reduction in sensorimotor function as early as 48 hpf; Paralysis of larvae at 4 dpf; Severe edema of the eye, pericardium, and yolk sac in larvae 6 dpf | [23]      |
| Pacific herring ( <i>Clupea harengus pallasi</i> )                                         | Larvae at 0, 4, and 11 dph                                                                                                    | STX                | 50, 400, 800, and 1,600 µg STX eq. L <sup>-1</sup>                                                                                                                                  | Dissolved STX acute exposure (24 h)                               | Inhibition of sensorimotor function; Progressive age-specific increase in STX-induced paralysis; No STX-induced morphological abnormalities                                            | [44]      |

|                                                 |                         |                                          |                                              |                                                          |                                                                                                                                                                                                              |      |
|-------------------------------------------------|-------------------------|------------------------------------------|----------------------------------------------|----------------------------------------------------------|--------------------------------------------------------------------------------------------------------------------------------------------------------------------------------------------------------------|------|
| Killifish ( <i>Fundulus heteroclitus</i> )      | Adults; brain           | STX                                      | 75 and 150 ppb                               | Dissolved STX acute exposure (60 min)                    | Decrease in c-Fos protein expression; Behavioral alterations                                                                                                                                                 | [45] |
| Wolf fish ( <i>Hoplias malabaricus</i> )        | Adults; brain           | 97% STX and 3% NeoSTX and GTX            | 0.08 µg STX eq. 100 g <sup>-1</sup> tissue   | Intraperitoneal inoculation; Subacute exposure (20 days) | Oxidative stress; Damage of DNA, proteins, and lipids                                                                                                                                                        | [46] |
| White seabream ( <i>Diplodus sargus</i> )       | Juveniles; Liver        | N-sulfocarpa-moyl and decarbamoyl toxins | 1.60 µg STX eq. kg <sup>-1</sup> body weight | Intracoelemic injection; Subacute exposure (2–6 days)    | GST activity induction (phase II biotransformation); Chromosome breaks or loss; Segregational anomalies                                                                                                      | [47] |
| Wolf fish ( <i>Hoplias malabaricus</i> )        | Adults; Liver and blood | 97% STX and 3% NeoSTX and GTX            | 0.08 µg STX eq. 100 g <sup>-1</sup> tissue   | Intraperitoneal inoculation; Subacute exposure (20 days) | Oxidative stress; No significant effect on the hepatosomatic index; Increase in hemoglobin concentration                                                                                                     | [48] |
| Marine medaka ( <i>Oryzias melastigma</i> )     | Embryos                 | STX                                      | 840 and 1260 µg. L <sup>-1</sup>             | Dissolved STX subacute exposure (15 dph)                 | Abnormal growth; High neuron development; Decrease in VTG and vtg1 protein expression; Reduction in the yolk sac size; Up-regulation in glycolytic and lipid metabolic proteins; Increase in stress proteins | [49] |
| Longfin yellowtail ( <i>Seriola rivoliana</i> ) | Larvae at 0 and 3 dph   | GTX2-3; dcGTX2-3; C1-2                   | 0.1 µg STX eq. mL <sup>-1</sup>              | Dissolved PSTs acute exposure (24 h)                     | High mortality; Increase in lipase activity and gene expression                                                                                                                                              | [36] |
| Zebrafish ( <i>Danio rerio</i> )                | Embryos                 | STX                                      | 0.05 and 0.1 µM                              | Dissolved STX subacute exposure (from 3 to 96 hpf)       | Mortality; Oxidative stress; Apoptosis; DNA damage                                                                                                                                                           | [42] |

|                                                 |                                                       |     |                              |                                                    |                                                                                                                                                                                                                  |            |
|-------------------------------------------------|-------------------------------------------------------|-----|------------------------------|----------------------------------------------------|------------------------------------------------------------------------------------------------------------------------------------------------------------------------------------------------------------------|------------|
| Zebrafish ( <i>Danio rerio</i> )                | Adults (males and females)                            | STX | 0.1 and 1 µg L <sup>-1</sup> | Dissolved STX chronic exposure (90 days)           | Decrease in body weight and length; Oxidative stress; Immunosuppression; No significant effect on reproductive parameters                                                                                        | [50]       |
| Longfin yellowtail ( <i>Seriola rivoliana</i> ) | Embryos at 8 and 26 hpf; Larvae at 44, 50, and 62 hpf | STX | 100 µg L <sup>-1</sup>       | Dissolved STX subacute exposure (from 8 to 62 hpf) | High mortality; Stage-specific sensitivity to the toxin; Genetic regulation of NaV channels; HSP induction; Increase in adipogenesis and lipid metabolism; Regulation of MAP kinases and phosphatases activities | This study |

---

**Table S2.** Marine toxins, chemical structure and main mode of action in the intoxicated organism. Adapted from Vasconcelos et al. [22] and Guillotin & Delcourt [18].

| Toxin        | Example of producing organism                                                                                   | Chemical type and structure                                                                               | Target / mode of action                                                                                                                           |
|--------------|-----------------------------------------------------------------------------------------------------------------|-----------------------------------------------------------------------------------------------------------|---------------------------------------------------------------------------------------------------------------------------------------------------|
| Saxitoxins   | <b>Dinoflagellates</b><br><i>Alexandrium</i> spp<br><i>Pyrodinium bahamense</i><br><i>Gymnodinium catenatum</i> | Alkaloid<br>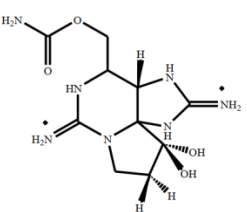            | Na <sup>+</sup> channels, site 1 of the $\alpha$ subunit / blockage<br>Ca <sup>2+</sup> channels / blockage<br>K <sup>+</sup> channels / blockage |
| Tetrodotoxin | <b>Bacteria</b><br><i>Vibrio</i> sp.<br><i>Serratia marcescens</i>                                              | Alkaloid<br>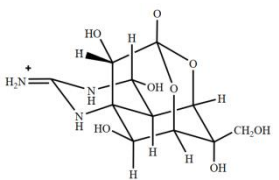            | Na <sup>+</sup> channels, site 1 of the $\alpha$ subunit / blockage                                                                               |
| Brevetoxins  | <b>Dinoflagellates</b><br><i>Karenia brevis</i>                                                                 | Polyethers<br>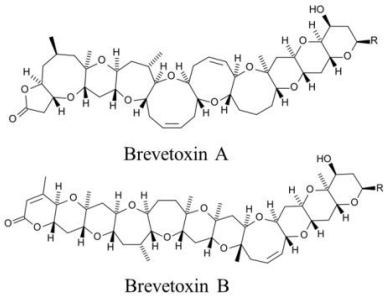         | Na <sup>+</sup> channels, site 5 of the $\alpha$ subunit / permanent activation                                                                   |
| Ciguatoxin   | <b>Dinoflagellates</b><br><i>Gambierdiscus</i> and <i>Fukuyoa</i>                                               | Polycyclic ethers<br>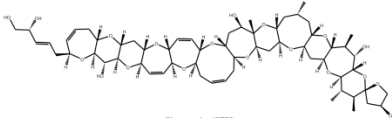 | Na <sup>+</sup> channels, site 5 of the $\alpha$ subunit / permanent activation<br>K <sup>+</sup> channels / blockage                             |
| Okadaic acid | <b>Dinoflagellates</b><br><i>Dynophysis</i> and<br><i>Prorocentrum</i>                                          | Polyethers<br>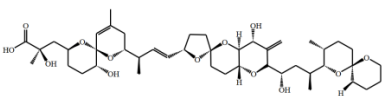        | Protein phosphatases / inhibition                                                                                                                 |
| Microcystin- | <b>Cyanobacteria</b><br><i>Microcystis aeruginosa</i>                                                           | Polyethers<br>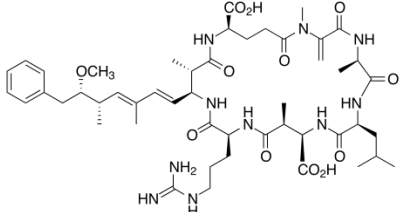        | Protein phosphatases / inhibition                                                                                                                 |
